# Supplementary material for: Essential role for InSyn1 in dystroglycan complex integrity and cognitive behaviors in mice
Source: eLife journal article supplement (doi:10.7554/elife.50712), 2019-12-12
Supplement: supp [file elife-50712-supp-v1.zip]

Archive with 11 entries (11 files):
- elife_poa_e50712_Figure_6_figure_supplement_5.pdf
- elife_poa_e50712_Figure_4_figure_supplement_2.pdf
- elife_poa_e50712_Figure_6_figure_supplement_1.pdf
- elife_poa_e50712_Figure_6_figure_supplement_4.pdf
- elife_poa_e50712_Figure_3_source_data_1.xlsx
- elife_poa_e50712_Figure_3_figure_supplement_1.pdf
- elife_poa_e50712_Figure_5_figure_supplement_1.pdf
- elife_poa_e50712_Figure_1_figure_supplement_1.pdf
- elife_poa_e50712_Figure_6_figure_supplement_3.pdf
- elife_poa_e50712_Figure_4_figure_supplement_1.pdf
- elife_poa_e50712_Figure_6_figure_supplement_2.pdf
