# Supplementary material for: Essential role for InSyn1 in dystroglycan complex integrity and cognitive behaviors in mice
Source: eLife journal article supplement (doi:10.7554/elife.50712), 2019-12-12
Supplement: supp [file elife-50712-supp-v1.zip › elife_poa_e50712_Figure_3_source_data_1.xlsx]

## Sheet: Sheet1
Probe name	Sequence (5' -> 3')	Description	Reference
Insyn1 R-H probe 1	CGATTCTCTCTGTCCATTCTTATACGTCGAGTTGAACGTCGTAACA	Hybridization probe
Insyn1 L-H probe 1	TAGCGCTAACAACTTACGTCGTTATGTAGATGGGCAGGTCTGAGCCC	Hybridization probe
Insyn1 R-H probe 2	GGGGCAGTGGCCTTTCCTCTTATACGTCGAGTTGAACGTCGTAACA	Hybridization probe
Insyn1 L-H probe 2	TAGCGCTAACAACTTACGTCGTTATGTAAGCAGTGTCGGGGCCGAGC	Hybridization probe
Insyn1 R-H probe 3	CCGTGGTCCAGTCATCTGGCTTATACGTCGAGTTGAACGTCGTAACA	Hybridization probe
Insyn1 L-H probe 3	TAGCGCTAACAACTTACGTCGTTATGTCCAGTTCAAAGTCAAAGTC	Hybridization probe
Insyn1 R-H probe 4	TTGAGTTCTCTCAGGATGCCTTATACGTCGAGTTGAACGTCGTAACA	Hybridization probe
Insyn1 L-H probe 4	TAGCGCTAACAACTTACGTCGTTATGTTCAAGTTGCCCGATGACCA	Hybridization probe
Insyn1 R-H probe 5	GGGTGGTCAACGGAGAGCGCTTATACGTCGAGTTGAACGTCGTAACA	Hybridization probe
Insyn1 L-H probe 5	TAGCGCTAACAACTTACGTCGTTATGTTGGTCTTGTAGGGGGCTGG	Hybridization probe
Insyn1 R-H probe 6	GCAAACCACCATTCATGAGCTTATACGTCGAGTTGAACGTCGTAACA	Hybridization probe
Insyn1 L-H probe 6	TAGCGCTAACAACTTACGTCGTTATGTGGTAGTCAGGGCCTGTGCC	Hybridization probe
Scramble R-H probe	AACCGGTACGTACGGATTGATTATACGTCGAGTTGAACGTCGTAACA	Hybridization probe	Nagendran, Riordan, Harbury, & Desai, 2018
Scramble L-H probe	TAGCGCTAACAACTTACGTCGTTATGAACCGGTACGTACGGATTGA	Hybridization probe	Nagendran, Riordan, Harbury, & Desai, 2018
CC05-DP5	/5Phos/TGTTAGCGCTAACAAAATGCTGCTGCTGTACTACGAACAACAATACACATGTTACGACGT	Connector circle probe	Nagendran, Riordan, Harbury, & Desai, 2018
CB2-31AC	/5Phos/TCAACTCGACGTATAACATAACGACGTAAGT	Common bridge probe	Nagendran, Riordan, Harbury, & Desai, 2018
DP5-Cy5	/5Cy5/ATGCTGCTGCTGTACTACG	Imager probe
