# Supplementary figures and images for: Essential role for InSyn1 in dystroglycan complex integrity and cognitive behaviors in mice
Source: eLife journal article supplement (doi:10.7554/elife.50712), 2019-12-12

Figure 6-figure supplement 5

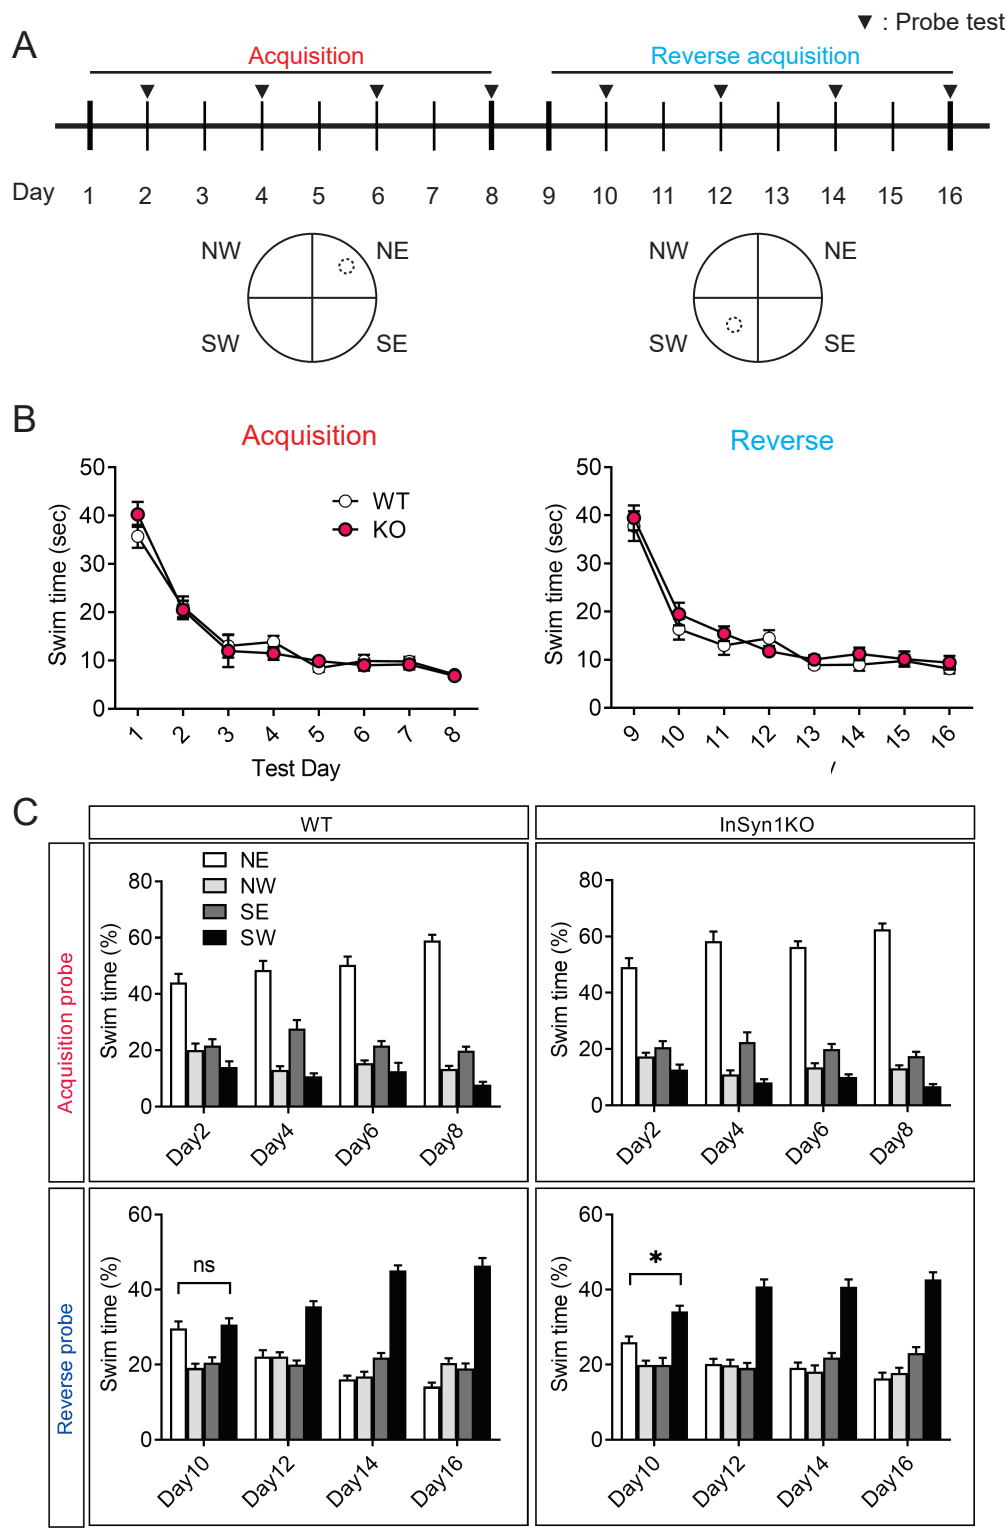

Supplement: supp [file elife-50712-supp-v1.zip › elife_poa_e50712_Figure_6_figure_supplement_5.pdf]

Figure 4-figure supplement 2

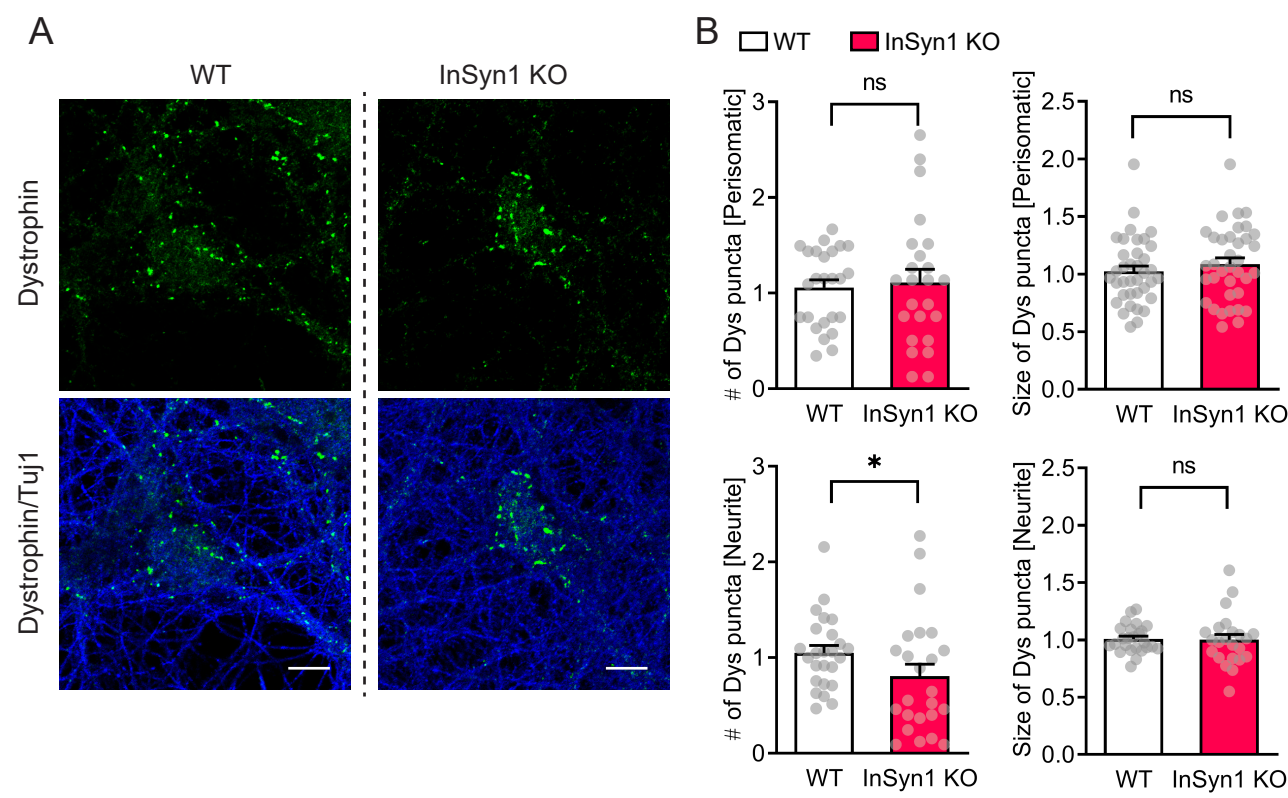

Supplement: supp [file elife-50712-supp-v1.zip › elife_poa_e50712_Figure_4_figure_supplement_2.pdf]

Figure 6-figure supplement 1

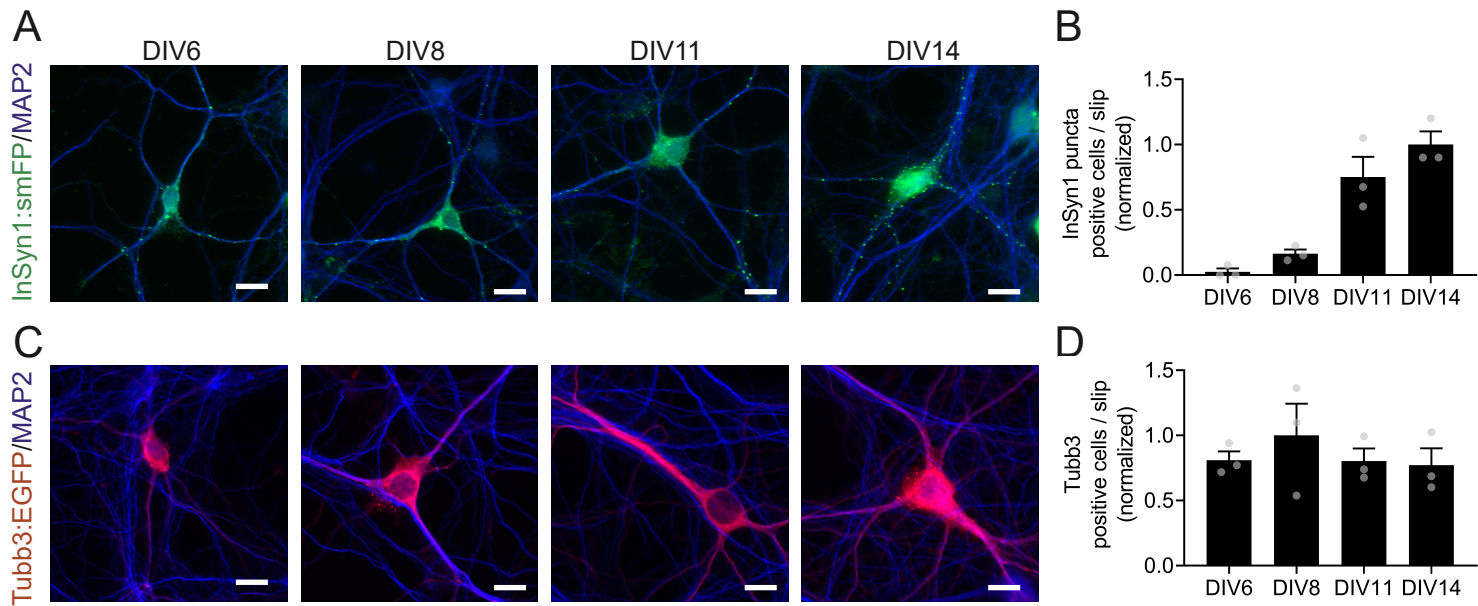

Supplement: supp [file elife-50712-supp-v1.zip › elife_poa_e50712_Figure_6_figure_supplement_1.pdf]

Figure 6-figure supplement 4

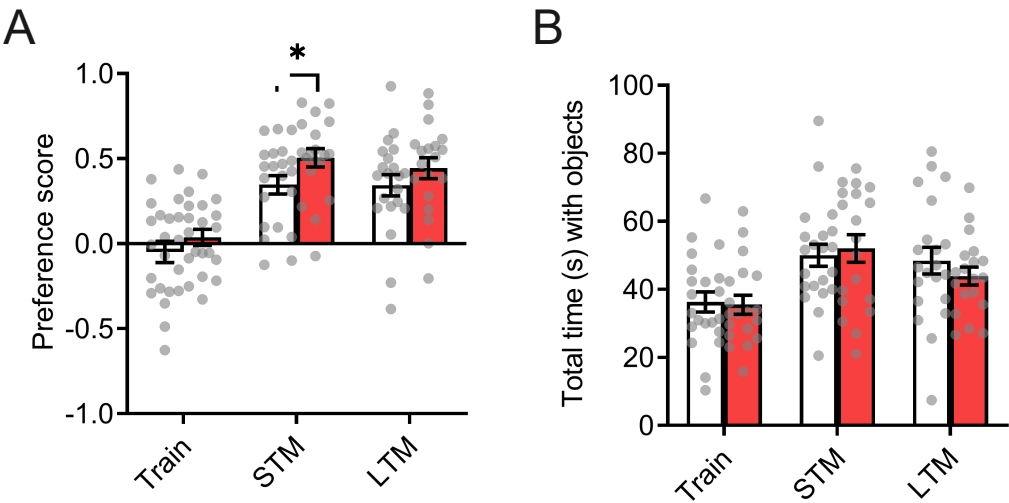

Supplement: supp [file elife-50712-supp-v1.zip › elife_poa_e50712_Figure_6_figure_supplement_4.pdf]

# Figure 3-figure supplement 1

# A

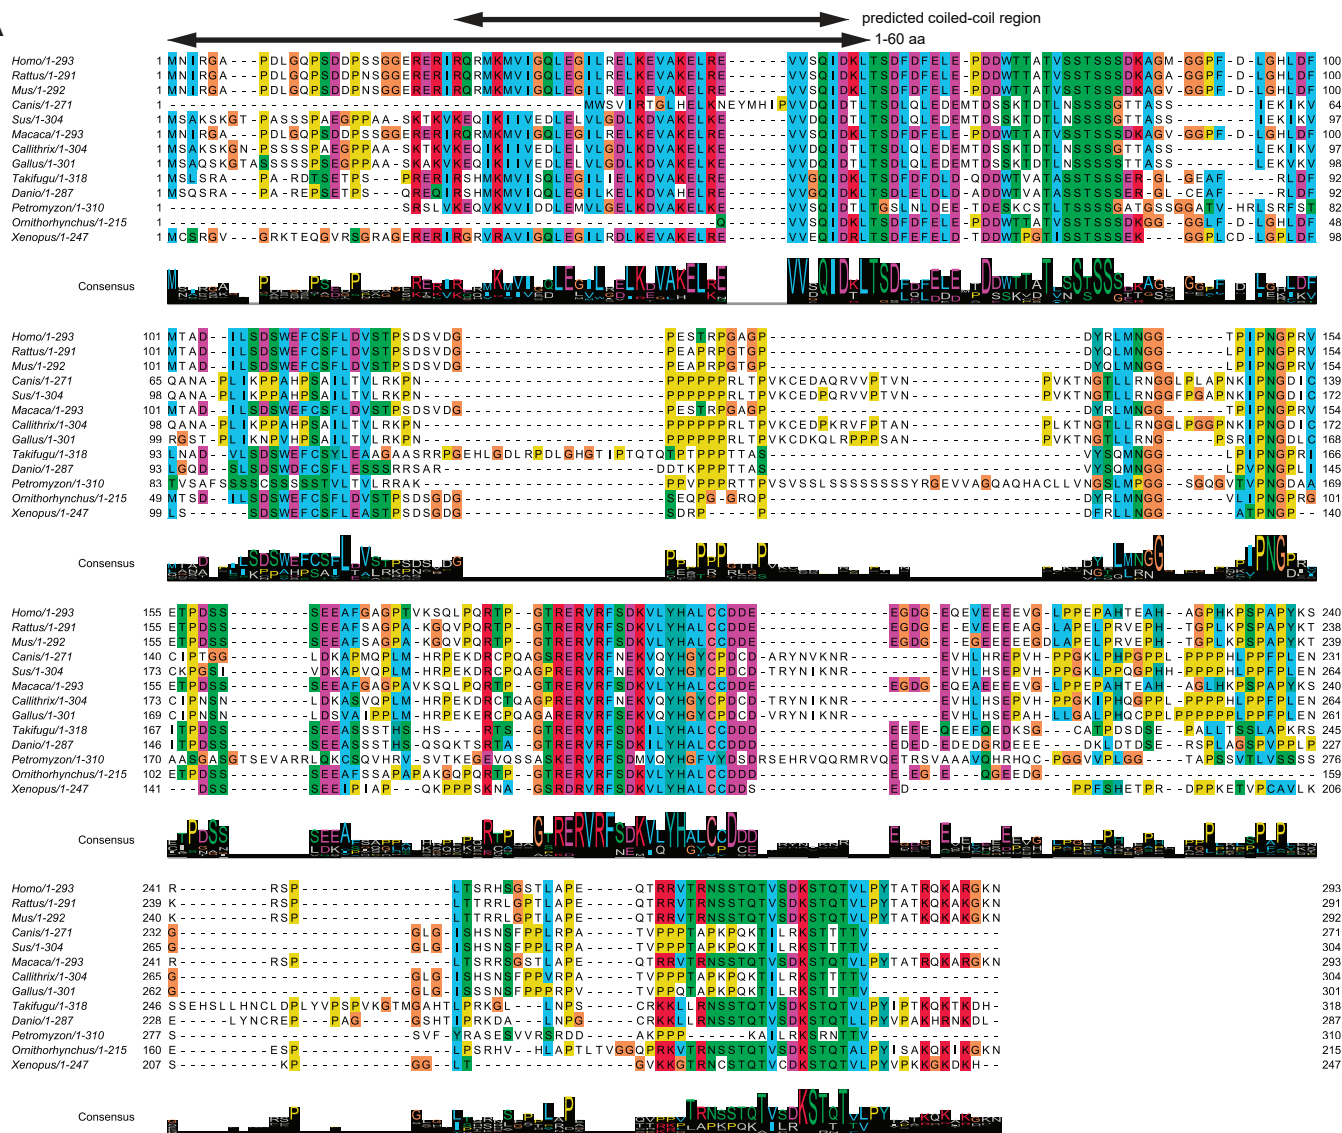

# B

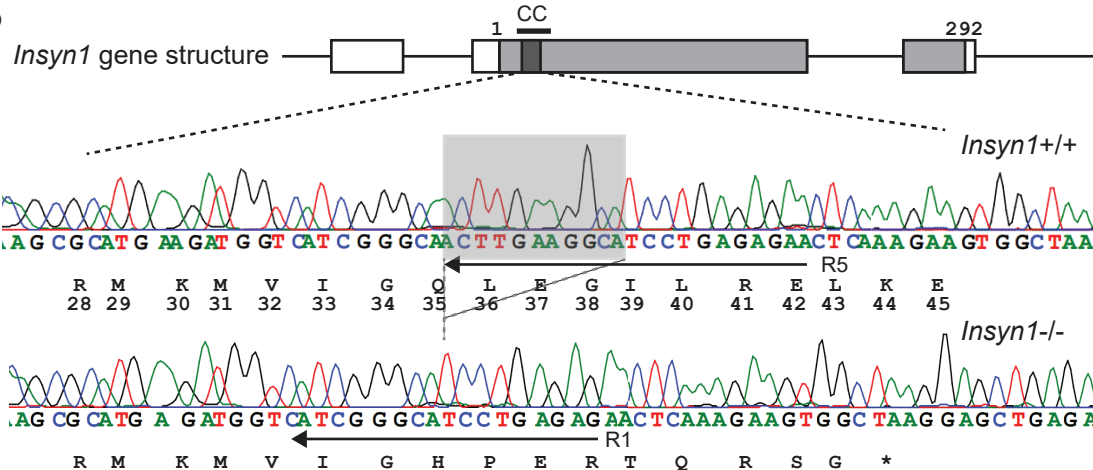

C

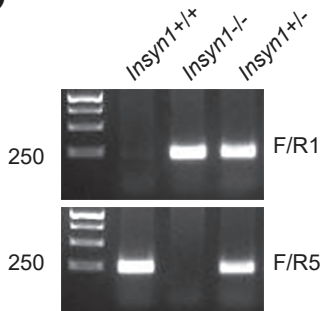

D

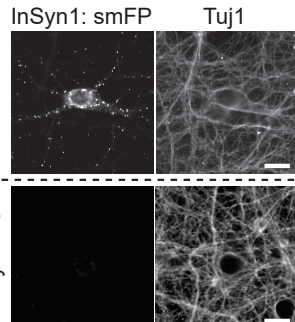

C

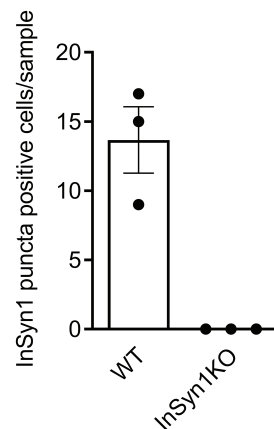

Supplement: supp [file elife-50712-supp-v1.zip › elife_poa_e50712_Figure_3_figure_supplement_1.pdf]

Figure 5-figure supplement 1

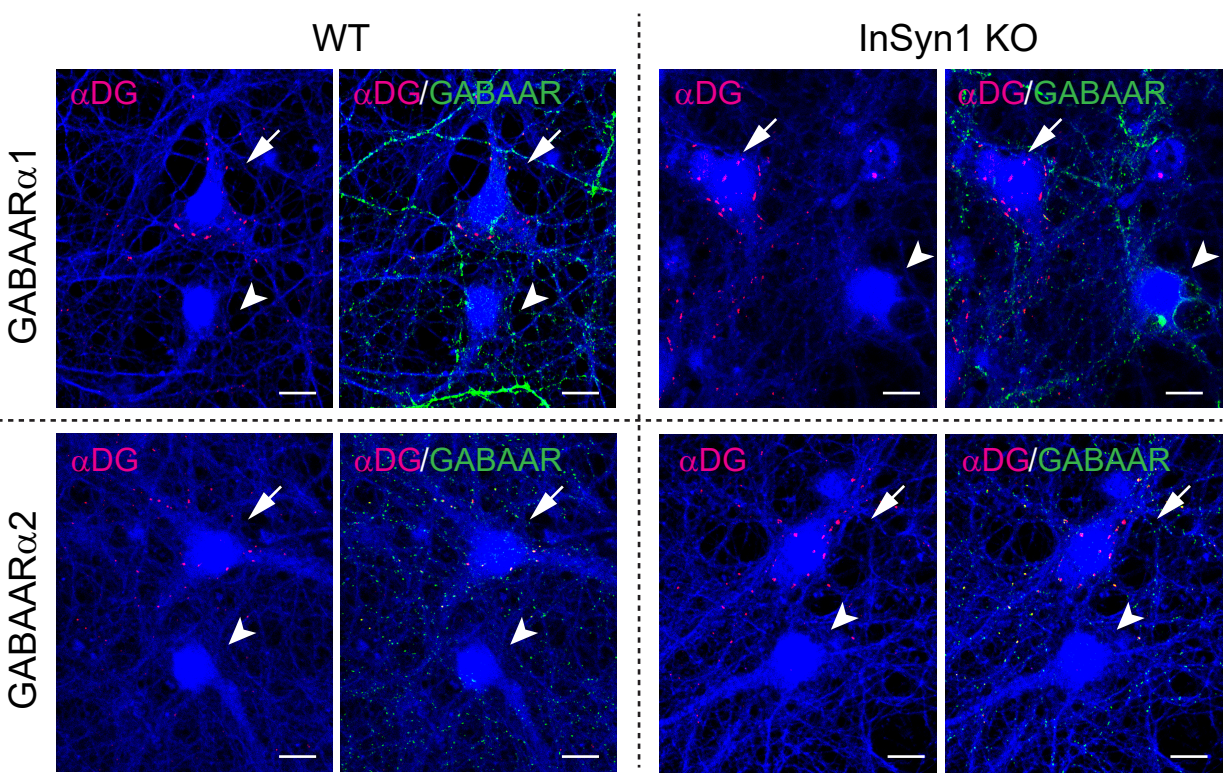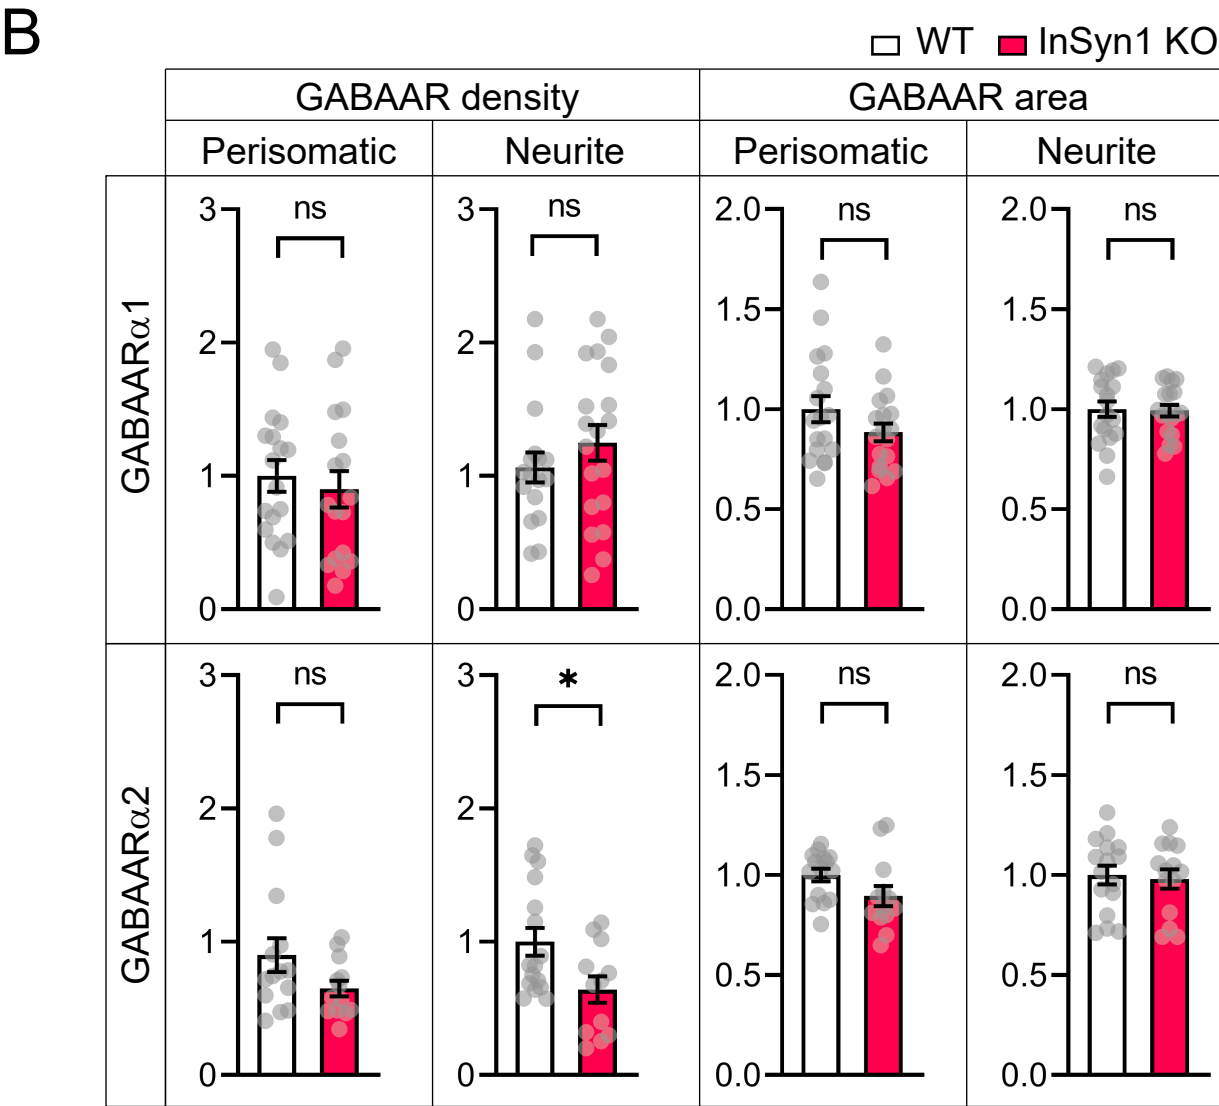

Supplement: supp [file elife-50712-supp-v1.zip › elife_poa_e50712_Figure_5_figure_supplement_1.pdf]

# Figure 1-figure supplement 1

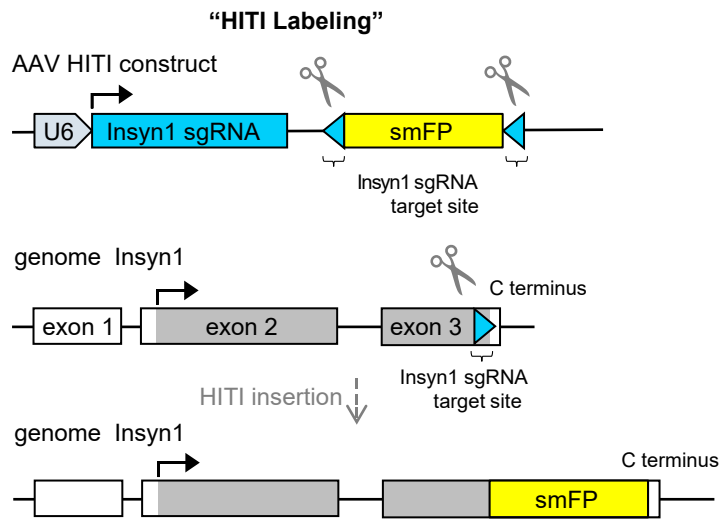

Supplement: supp [file elife-50712-supp-v1.zip › elife_poa_e50712_Figure_1_figure_supplement_1.pdf]

Figure 6-figure supplement 3

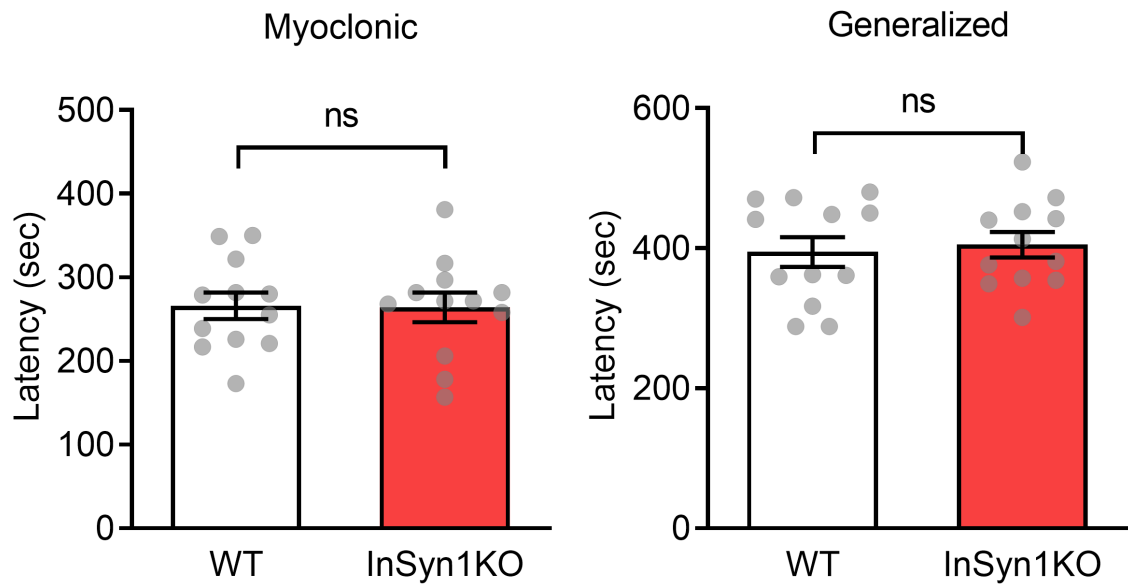

Supplement: supp [file elife-50712-supp-v1.zip › elife_poa_e50712_Figure_6_figure_supplement_3.pdf]

Figure 4-figure supplement 1

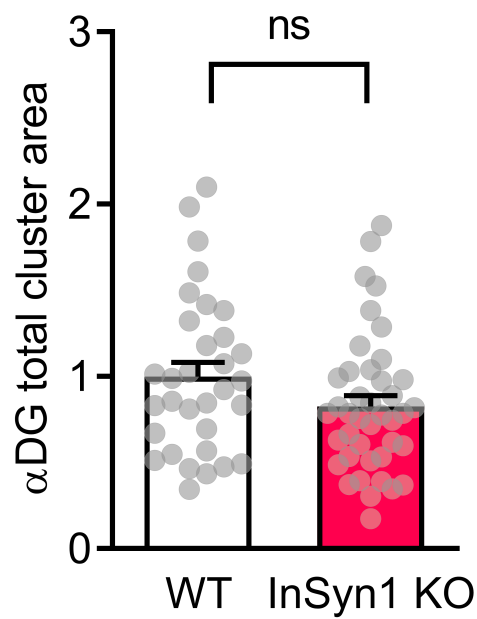

Supplement: supp [file elife-50712-supp-v1.zip › elife_poa_e50712_Figure_4_figure_supplement_1.pdf]

Figure 6-figure supplement 2

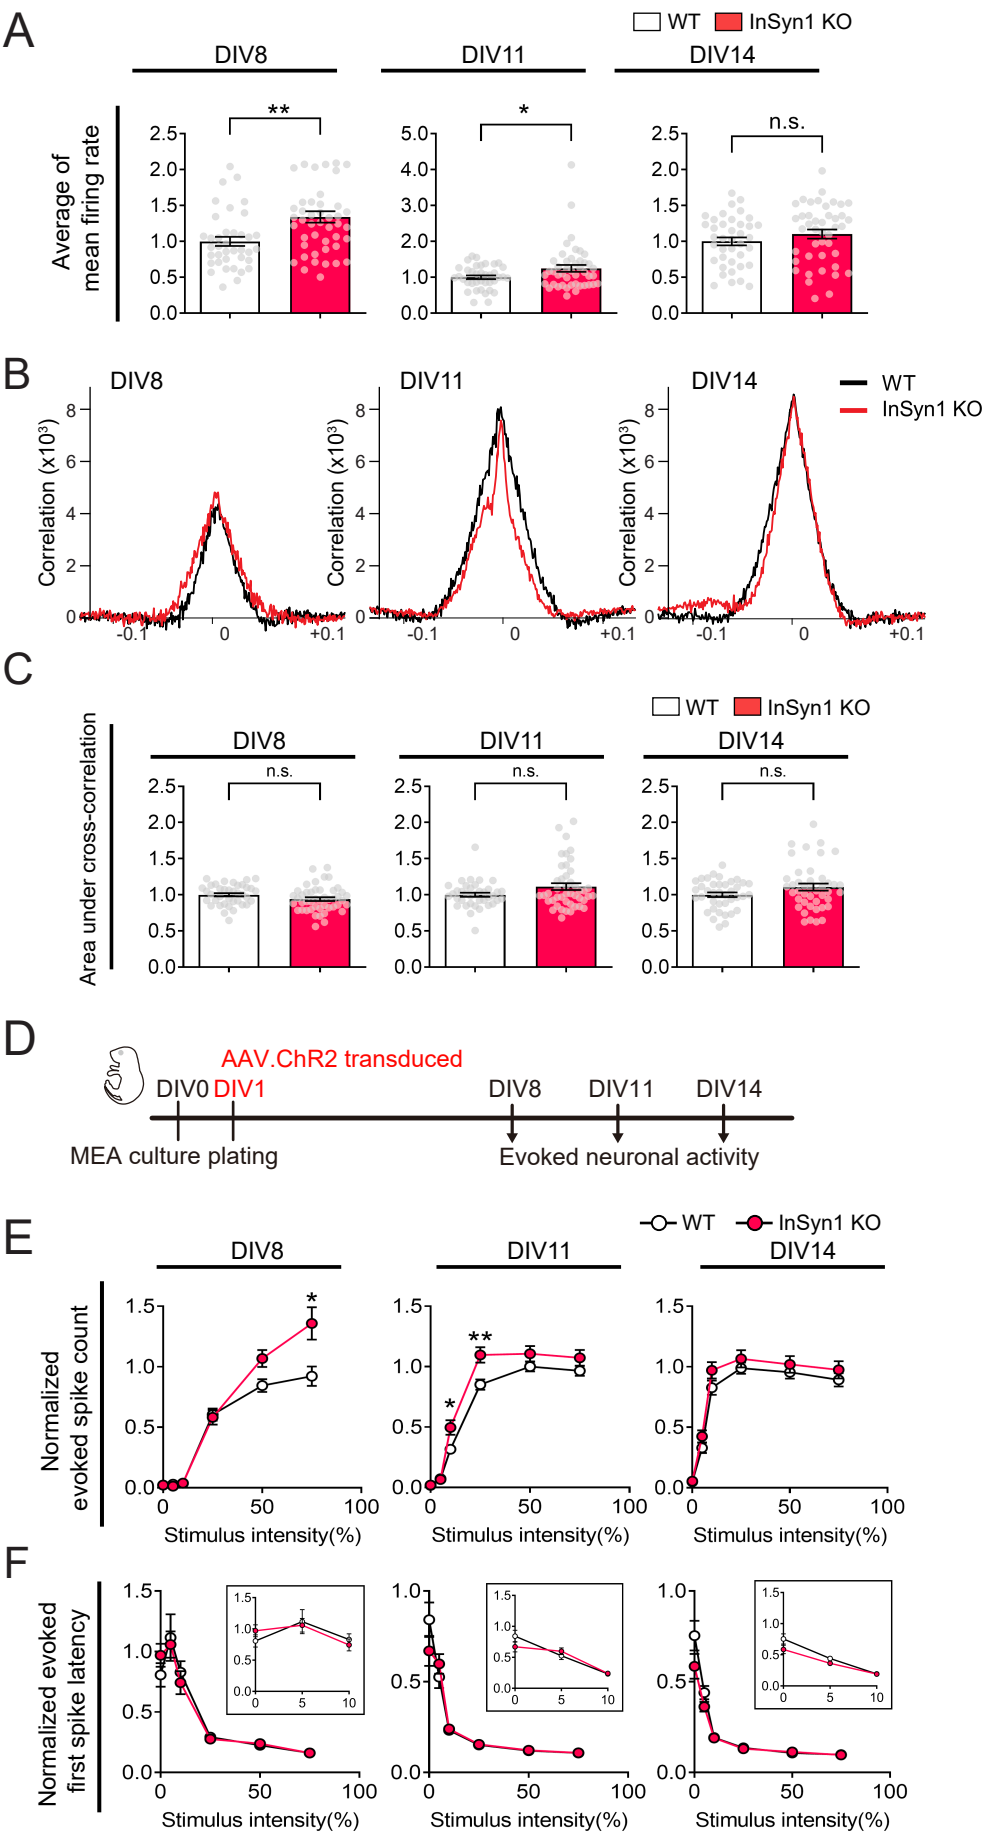

Supplement: supp [file elife-50712-supp-v1.zip › elife_poa_e50712_Figure_6_figure_supplement_2.pdf]
